# Supplementary material for: A DFT study on methanol decomposition over single atom Pt/CeO2catalysts: the effect of the position of Pt
Source: Royal Society of Chemistry journal article supplement (doi:10.1039/d3cp01066j), 2023-01-01
Supplement: d3cp01066j5.pdf [file d3cp01066j5.pdf]

| Pt <sub>4</sub> /CeO <sub>2</sub>                                                | Pt <sub>6</sub> /CeO <sub>2</sub>                                                  | Pt <sub>7</sub> /CeO <sub>2</sub>                                                   | Pt <sub>10</sub> /CeO <sub>2</sub>                                                  |
|----------------------------------------------------------------------------------|------------------------------------------------------------------------------------|-------------------------------------------------------------------------------------|-------------------------------------------------------------------------------------|
| 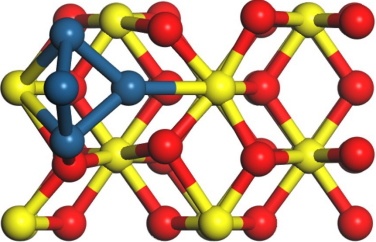 |  |  |  |
| Average <i>BE</i> = -1.63 eV                                                     | Average <i>BE</i> = -1.15 eV                                                       | Average <i>BE</i> = -1.67 eV                                                        | Average <i>BE</i> = -1.49 eV                                                        |
