# Supplementary material for: A DFT study on methanol decomposition over single atom Pt/CeO2catalysts: the effect of the position of Pt
Source: Royal Society of Chemistry journal article supplement (doi:10.1039/d3cp01066j), 2023-01-01
Supplement: d3cp01066j10.pdf [file d3cp01066j10.pdf]

| Table S10. Comparison of previous work on the mechanism of MD reaction over CeO <sub>2</sub> -supported catalysts.                                               |                                                                                    |                    |                                                               |                                    |              |
|------------------------------------------------------------------------------------------------------------------------------------------------------------------|------------------------------------------------------------------------------------|--------------------|---------------------------------------------------------------|------------------------------------|--------------|
| Catalyst                                                                                                                                                         | Structural model                                                                   | Research method    | Mechanism                                                     | RDS energy barrier                 | Reference    |
| Pt <sub>1</sub> /Ce <sub>1-x</sub> O <sub>2</sub> (110) ,<br>Pt <sub>7</sub> /CeO <sub>2</sub> (110),<br>Pt <sub>1</sub> /Ce <sub>1-x</sub> O <sub>2</sub> (110) | 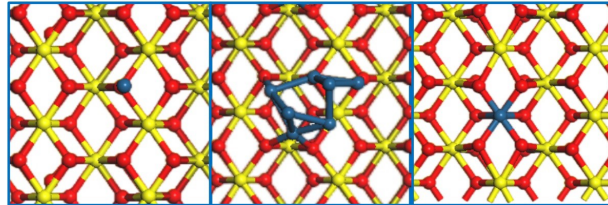  | DFT calculations   | CH <sub>3</sub> OH→CH <sub>3</sub> O→CH <sub>2</sub> O→CHO→CO | 1.114 eV,<br>0.602 eV,<br>0.568 eV | In this work |
| Pt <sub>1</sub> /CeO <sub>2</sub>                                                                                                                                | Pt-CeO <sub>2</sub> interaction is still unclear                                   | DRIFTS             | CH <sub>3</sub> OH→CH <sub>3</sub> O→CO                       | /                                  | 48           |
| CeO <sub>2</sub> (111)                                                                                                                                           |   | TPSR-IR and<br>DFT | CH <sub>3</sub> OH→formate                                    | /                                  | 38           |
| Cu/CeO <sub>2</sub>                                                                                                                                              | Cu clusters loaded on CeO <sub>2</sub>                                             | TPD-DRIFTS         | CH <sub>3</sub> OH→CH <sub>3</sub> O→formate→CO               | /                                  | 39           |
| Ni <sub>3</sub> /CeO <sub>2</sub> (111̄)<br>Ni <sub>3</sub> /CeO <sub>2</sub> (111̄)                                                                             |  | DFT calculations   | CH <sub>3</sub> OH→CH <sub>3</sub> O→CH <sub>2</sub> O→CO     | 3.805 eV,<br>1.662 eV              | 40           |
