# Supplementary figures and images for: A DFT study on methanol decomposition over single atom Pt/CeO2catalysts: the effect of the position of Pt
Source: Royal Society of Chemistry journal article supplement (doi:10.1039/d3cp01066j), 2023-01-01

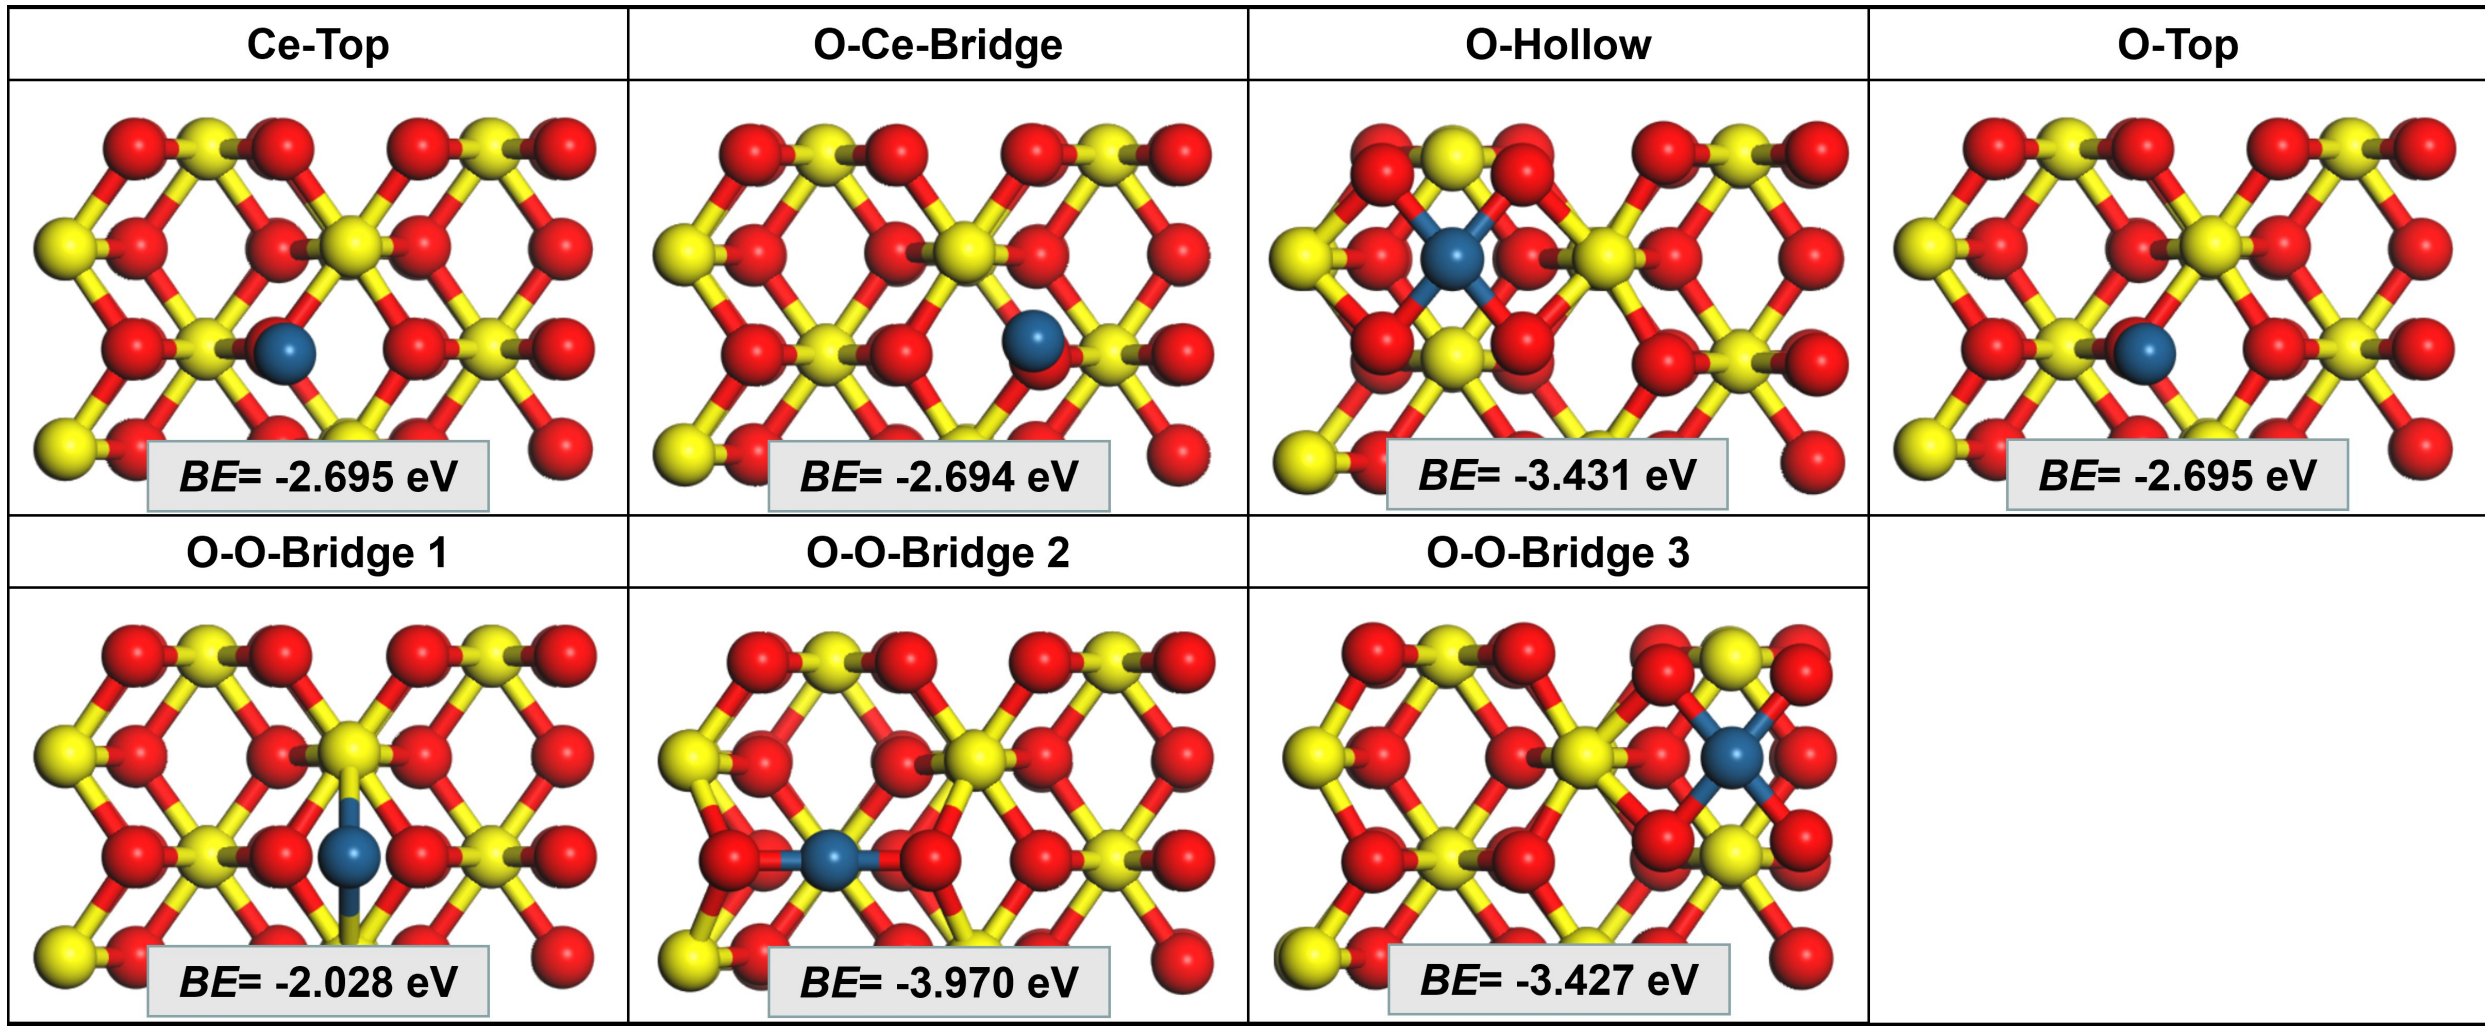

Supplement: d3cp01066j4.pdf [file d3cp01066j4.pdf]
